# Supplementary figures and images for: Combined Mastopexy and Augmentation with Autologous Fat Grafting: First Results with Lipopexy
Source: PubMed Central journal article supplement — Plast Reconstr Surg Glob Open. 2020 Feb 25;8(2):e1957. doi: 10.1097/GOX.0000000000001957 (PMC7159954; doi:10.1097/gox.0000000000001957), 2020-02-25

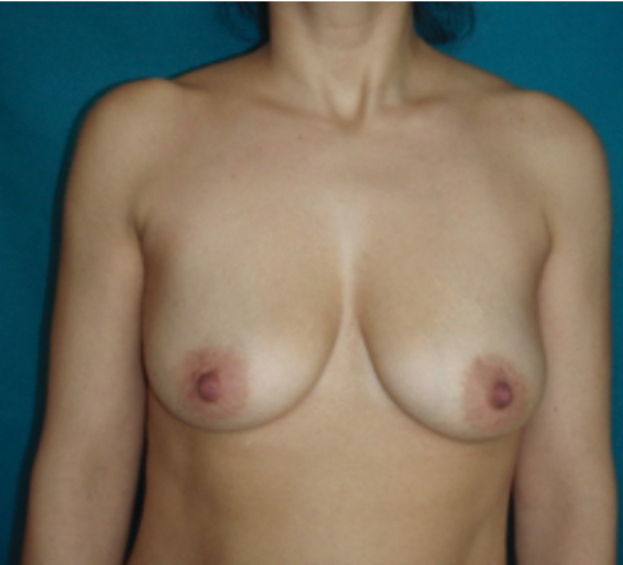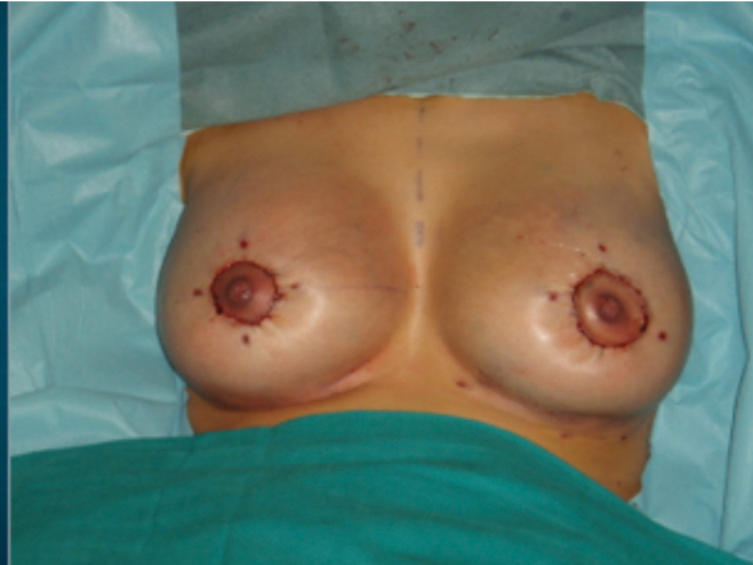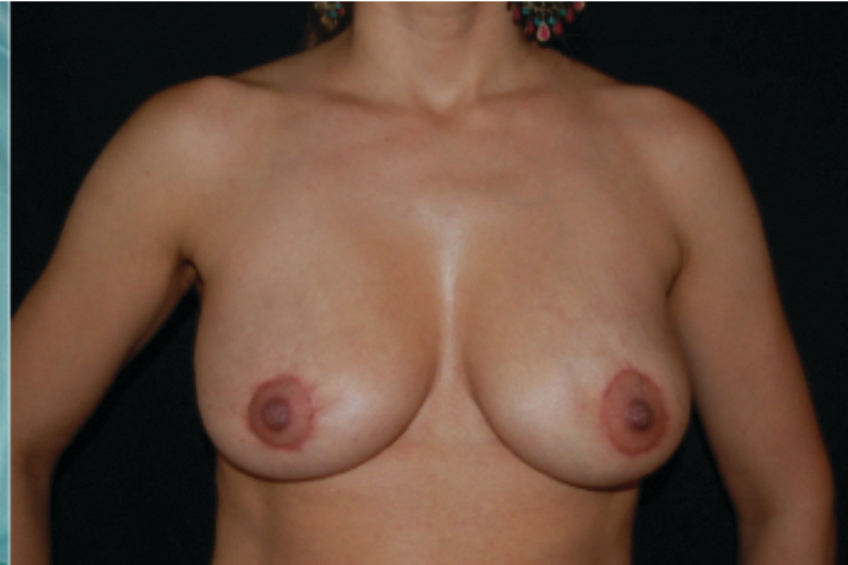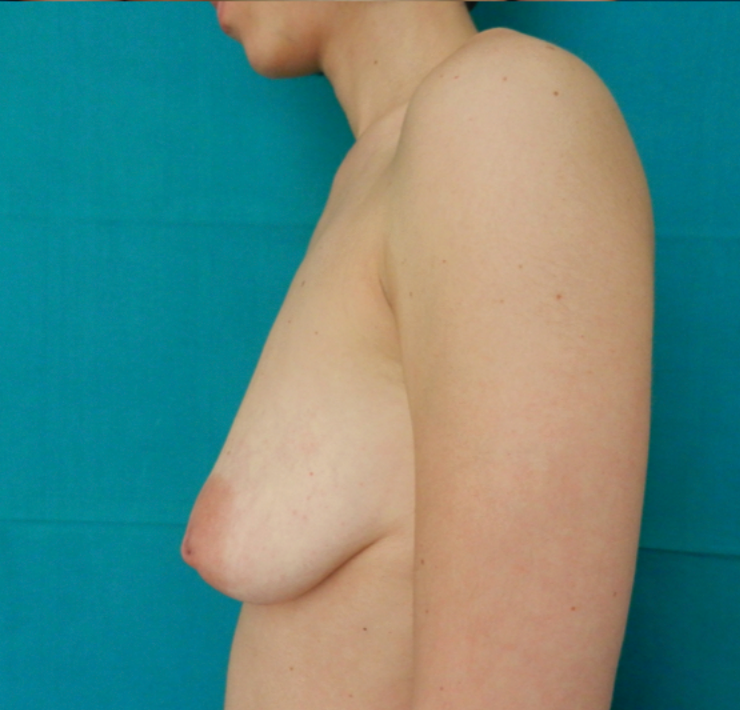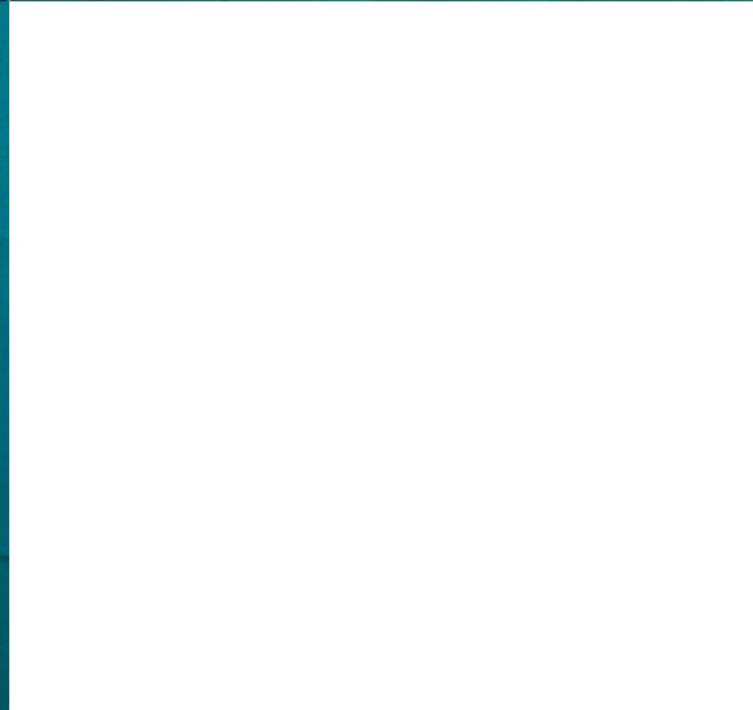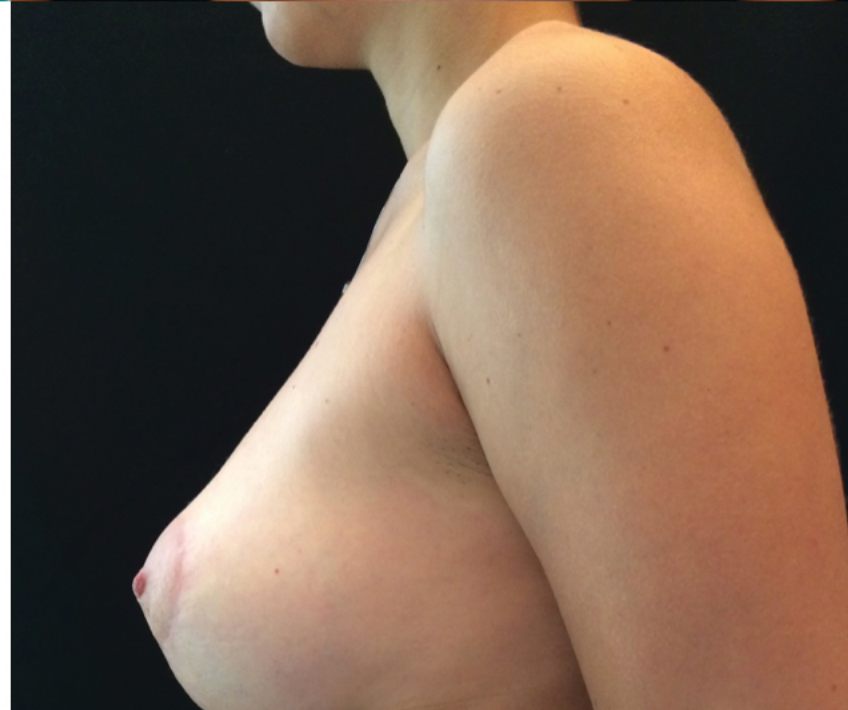

Supplement: gox-8-e1957-s001.pdf [file gox-8-e1957-s001.pdf]

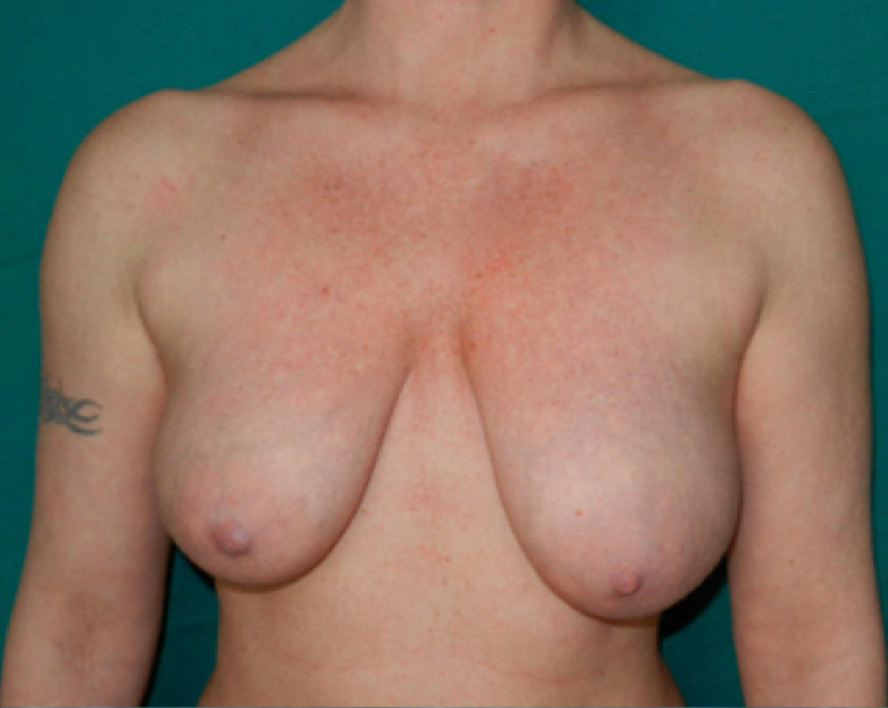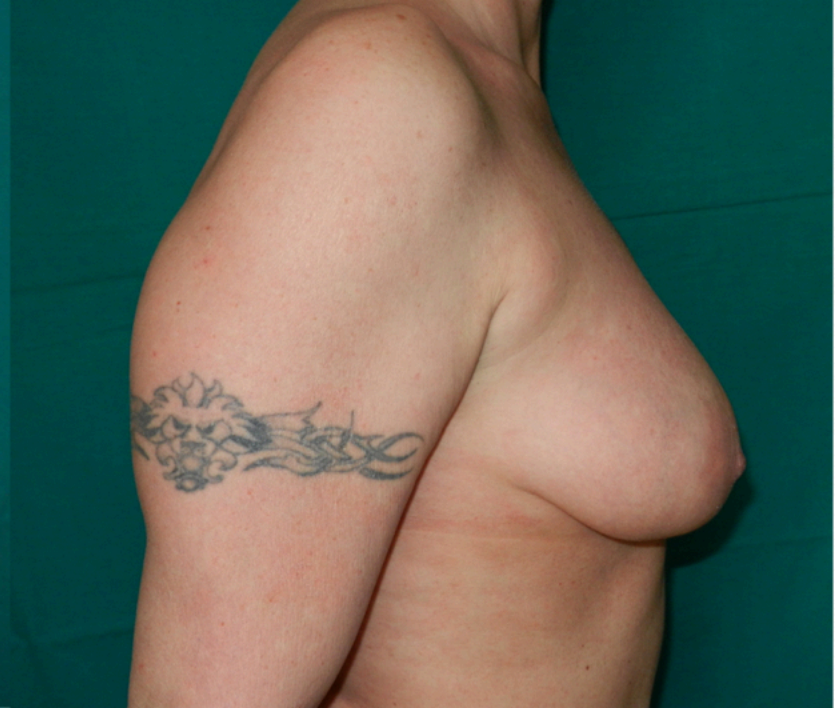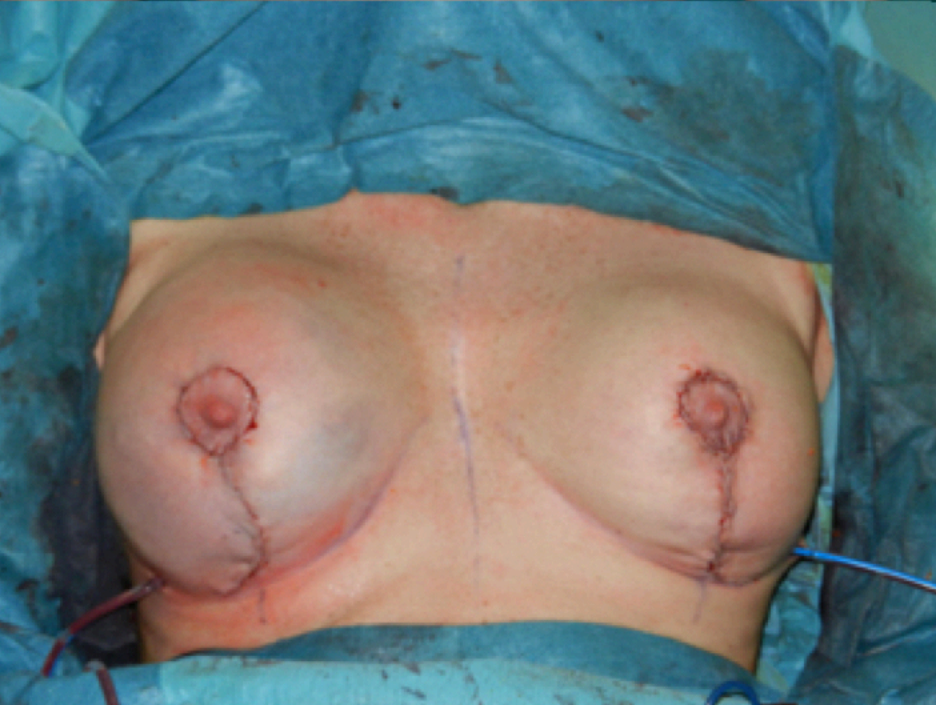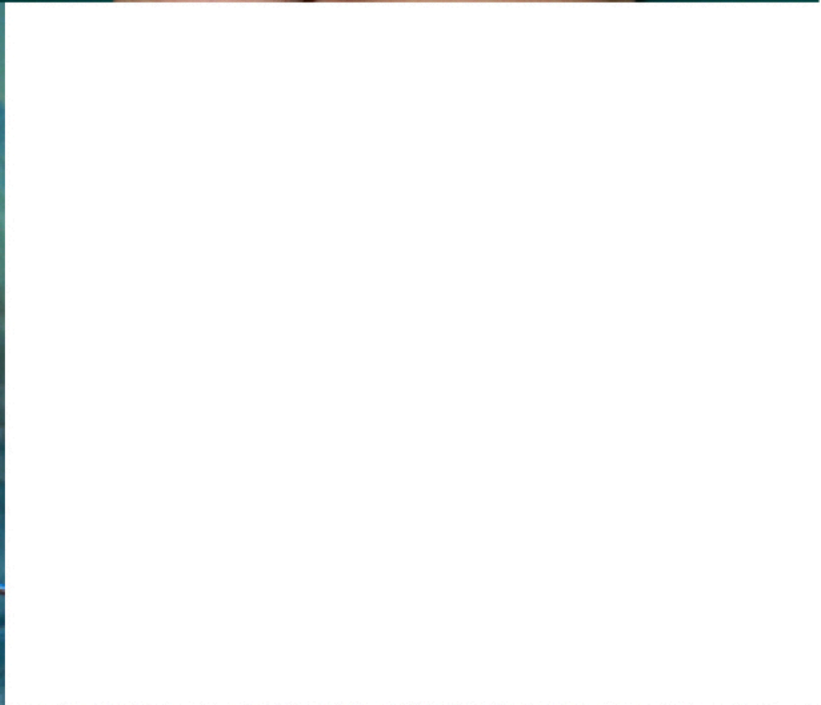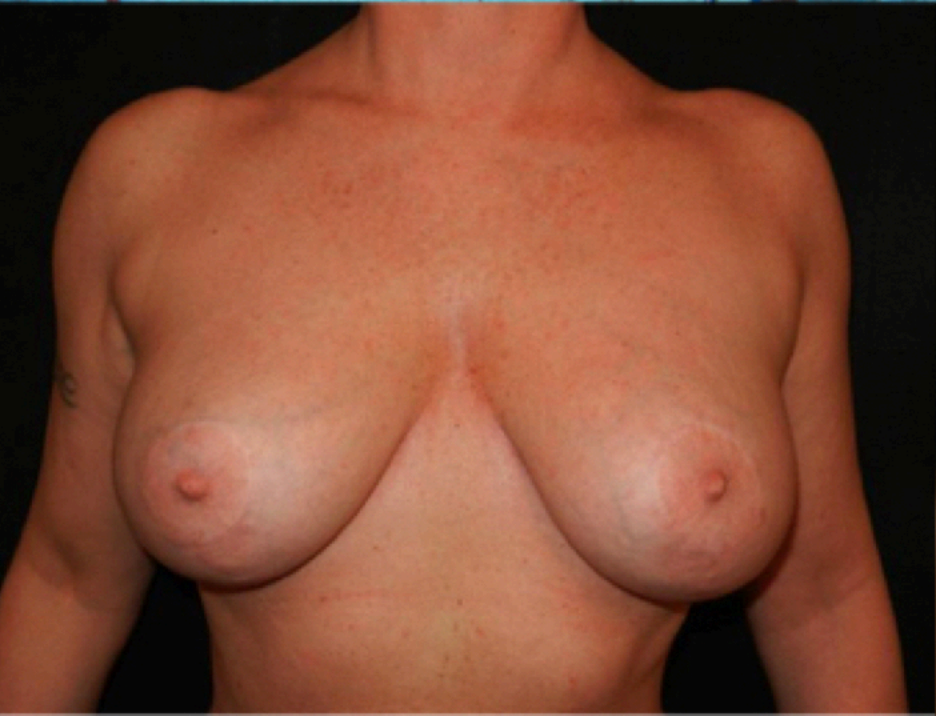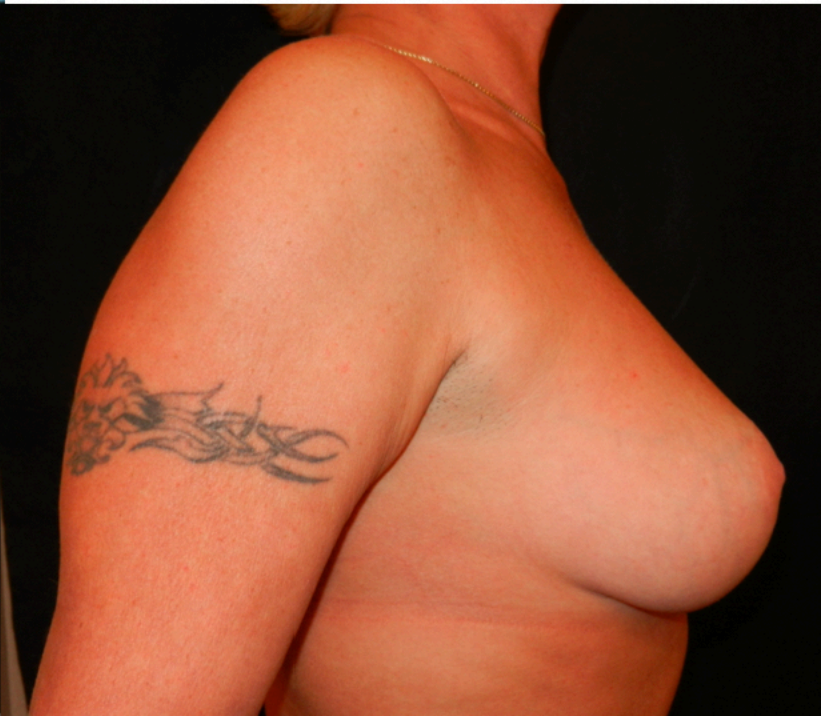

Supplement: gox-8-e1957-s002.pdf [file gox-8-e1957-s002.pdf]
